# Significant Correlation between Growth Temperature and Guanine-Cytosine Content in Bacteria

En-Ze Hu<sup>†</sup>, Xin-Ran Lan<sup>†</sup>, Zhi-Ling Liu, Jie Gao, and Deng-Ke Niu\*

MOE Key Laboratory for Biodiversity Science and Ecological Engineering and Beijing Key Laboratory of Gene Resource and Molecular Development, College of Life Sciences, Beijing Normal University, Beijing, 100875, China

<sup>†</sup>These authors contributed equally to this paper.

\*Corresponding author: Deng-Ke Niu, [dkniu@bnu.edu.cn](mailto:dkniu@bnu.edu.cn), [dengkeniu@hotmail.com](mailto:dengkeniu@hotmail.com)

## Abstract

Because GC pairs are more stable than AT pairs, GC-rich sequences were proposed to be more adapted to high temperatures than AT-rich sequences. Previous studies consistently showed positive correlations between the growth temperature and the GC contents of structural RNA genes. However, for the whole genome sequences and the silent sites of the codons in protein-coding genes, the relationship between GC content and growth temperature is in a long-lasting debate. With a dataset much larger than previous studies (681 bacteria and 155 archaea), our phylogenetic comparative analyses showed positive correlations between optimal growth temperature and GC content exists, both in the structural RNA genes of bacteria and archaea and in bacterial whole genome sequences, chromosomal sequences, plasmid sequences, core genes, and accessory genes. However, in the 155 archaea, we did not observe a significant positive correlation of optimal growth temperature with whole-genome GC content or GC content at four-fold degenerate sites. We randomly drew 155 samples from the 681 bacteria for 1000 rounds. In most cases (> 95%), the positive correlations between optimal growth temperature and genomic GC content became statistically nonsignificant ( $P > 0.05$ ). This result suggested that the small sample sizes might account for the lack of positive correlations between growth temperature and genomic GC content in the 155 archaea and the bacterial samples of previous studies.

*Key words:* GC content, optimal growth temperature, prokaryotes, phylogenetic generalized least squares (PGLS), resampling analysis.

## Introduction

As guanine (G) strictly pairs with cytosine and adenine (A) pairs with thymine (T) in DNA double helix, the amount of G is equal to C, and that of A is equal to T in the genomes of any cellular organisms. GC content, i.e., the percentage of G+C, is widely used as a measure of genomic

nucleotide composition. It is a highly variable trait ranging from 8% to 75% (Basak et al. 2010; Nguyen et al. 2020). This genomic trait has been widely studied, and its evolution has been proposed to be associated with numerous mutational and selective forces driven by genetic, metabolic, and ecological factors (Foerstner et al. 2005; Hildebrand et al. 2010; Mann and Chen 2010; Raghavan et al. 2012; Wu et al. 2012; Agashe and Shankar 2014; Glemin et al. 2014; Šmarda et al. 2014; Reichenberger et al. 2015; Aslam et al. 2019; Dietel et al. 2019; Weissman et al. 2019). Among these factors, the high temperature might be the most long-debating one (Meyer 2021). Because G:C pairs have an additional hydrogen bond than A:T pairs, the GC-rich genomes are thermally stable and thus more adapted to high-temperature environments. Bernardi and Bernardi (1986) proposed this hypothesis to explain the higher GC content of warm-blooded animals.

As prokaryotes have a much wider thermal distribution on earth than plants and animals, bacterial and archaeal genomes are the best materials to test the thermal adaptation hypothesis. An analysis of 764 prokaryotic species, including mesophilic genera and thermophilic genera, did not find a correlation between whole-genome GC content ( $GC_w$ ) and the optimal growth temperature ( $T_{opt}$ ) (Galtier and Lobry 1997). However, this study found a significant positive correlation between  $T_{opt}$  and the GC content of structural RNA (tRNAs and rRNAs). The rationale of these observations is that the secondary structures of tRNAs and rRNAs are more sensitive to elevated temperature than the double-strand helix of DNA. In most prokaryotes, protein-coding genes take most of the genome size. Protein structures and functions constrain the GC content at the nonsynonymous sites of the codons. This functional constraint might conceal the hypothetical thermal adaptation. Compared with  $GC_w$ , the GC content at the third sites of the codons ( $GC_3$ ) is more desirable to test the thermal adaptation hypothesis. Early solitary cases indicated that  $GC_3$  might be related to growth temperature. For example, the tyrosyl-tRNA synthetase gene isolated from the thermophile *Bacillus stearothermophilus* has a higher  $GC_3$  than the homologous gene in *Escherichia coli*, 68.0% vs. 59.4% (Winter et al. 1983). The *leuB* gene isolated from the extreme thermophile *Thermus thermophilus* HB8 has an extremely high  $GC_3$ , 89.4% (Kagawa et al. 1984). For a general conclusion, Hurst and Merchant (2001) examined the relationship between  $GC_3$  and  $T_{opt}$  of 29 archaeal species and 72 bacterial species. Unfortunately, they found that  $T_{opt}$  is not significantly correlated with  $GC_3$  or  $GC_w$ . At the same time, they also found a significant positive correlation between the GC content of structural RNAs and the  $T_{opt}$  in both archaea and bacteria. As their analysis had accounted for the effect of shared ancestry, they provided more robust evidence against the thermal adaptation hypothesis. Soon afterward, Xia et al. (2002) showed that growth at increasing temperature (from 37°C to 45°C) for 14,400 generations did not increase but decreased the genomic GC content of the bacterium *Pasteurella multocida*. Meanwhile, the GC contents of two genes, *ldh-a* and *α-actin*, have been analysed across 51 vertebrate species with adaptation temperatures ranging from -1.86°C to approximately 45°C. No significant positive correlation between living temperature and GC content was found, no matter the GC content

is measured by the entire sequences, the third codon position, or the fourfold degenerate sites (Ream et al. 2003).

Subsequently, Musto et al. (2004) published a debate-provoking study. As many environmental factors likely influence genomic GC content evolution, closely related species are expected to differ in fewer environmental factors than distantly related species. The correlation of GC content with growth temperature is less likely to be disturbed by other factors. Therefore, Musto et al. (2004) examined the relationship between genomic GC content and  $T_{opt}$  with each prokaryotic family. Among the 20 families they studied, the number of families with positive correlations is significantly higher than expected by chance, no matter the effect of shared ancestry was accounted for or not. Meanwhile, they observed a significant positive correlation when considering all independent contrasts from different families together. However, Marashi and Ghalanbor (2004) noticed that most of the significant correlations within each family depend heavily on the presence of a few outlier species. Exclusion of only one species would lead to loss of significant correlations in several families. Basak et al. (2005) pointed out that the correlation is sensitive to the presence or absence of a few outliers in some families because the sample sizes in these families were too small. Using non-parametric correlation analysis that is not sensitive to the presence of outliers, Musto et al. (2005) repeated their analysis and confirmed their previous results. The debate did not end after that. Wang et al. (2006) updated the  $T_{opt}$  values for some species and found that the positive correlation between  $T_{opt}$  and genomic GC content in two families disappeared. Besides, they suggested that the positive correlation between  $T_{opt}$  and genomic GC content in the family Enterobacteriaceae should be explained by the correlation between genome size and optimal temperature. Still, this study did not shake the confidence of Musto et al. (2006) on the correlation between  $T_{opt}$  and genomic GC content in prokaryotes. Although Musto and coauthors have rebutted all the criticisms, their studies have not convinced later authors of review articles (Agashe and Shankar 2014; Meyer 2021). For example, Agashe and Shankar (2014) claimed that "*it seems unlikely that genomic GC content is driven by thermal adaptation*" after reviewing the results of Hurst and Merchant (2001) and Xia et al. (2002), but without mentioning the debates on Musto et al. (2004).

Like the study of Ream et al. (2003) in vertebrates, Zheng and Wu (2010) focused on the GC content in the coding regions of four genes across 815 prokaryotic species, including mesophiles, thermophiles, and hyperthermophiles. They found a positive correlation between the temperature and GC content after controlling a series of environmental and phylogenetic factors. These four genes shared by all the 815 prokaryotic genomes are members of the core genomes.

Using a manually collected dataset of growth temperature and without accounting for the effect of the common ancestor, Sato et al. (2020) recently confirmed the results of Galtier and Lobry (1997). It should be noted that the correlation between  $T_{opt}$  and the GC content of structural RNA was consistently observed in much more studies than those mentioned above (Galtier and Lobry 1997; Khachane et al. 2005; Kimura et al. 2006; Kimura et al. 2007; Kimura et al. 2013; Sato et al. 2020).

By contrast, as mentioned above, the correlation between  $T_{opt}$  and genomic GC content, if it exists, depends heavily on the sample size, the families of prokaryotes, the particular sequences, and the methods used to detect it.

Benefit from the manually curated dataset of growth temperature from the database TEMPURA (Sato et al. 2020), we carried out a comprehensive analysis on the relationship between growth temperature and GC content. The present study covers three indexes of growth temperature (maximal growth temperature [ $T_{max}$ ],  $T_{opt}$ , and minimal growth temperature [ $T_{min}$ ]) and a series of GC content indexes, including GC content of the whole genome ( $GC_w$ ), GC content of the protein-coding sequences ( $GC_p$ ), GC content at fourfold degenerate sites ( $GC_4$ ), GC content of the genes coding structural RNAs (tRNA,  $GC_{tRNA}$ ; 5S rRNA,  $GC_{5S}$ ; 16S rRNA,  $GC_{16S}$ ; 23S rRNA,  $GC_{23S}$ ) and GC content of non-coding DNA ( $GC_{non}$ , including intergenic sequences and untranslated regions of mRNA that are generally unannotated in prokaryotic genomes). The whole genome, primary chromosome genome sequences, plasmid genomes, core genome, and accessory genome of each bacterial or archaeal species have been examined separately. Our results consistently support the existence of a positive correlation between genomic GC content and growth temperature.

## Results

### Strong phylogenetic signals in both GC contents and growth temperatures

A significant force shaping the prokaryotic evolution is horizontal gene transfer, which makes the genealogical relationships among bacteria and archaea exhibit a somewhat network-like structure. If bifurcation is not the phylogeny's dominant pattern, most phylogenetic comparative methods will not be necessary for prokaryotic evolutionary studies. We are not sure how much this impression has influenced the researchers in prokaryotic genomic studies, but many papers did not use any phylogenetic comparative methods. Despite the frequent horizontal gene transfers, careful examination of the prokaryotic phylogeny could see a statistical tree (Koonin 2015; DeSalle and Riley 2020; Blais and Archibald 2021). In principle, the necessity of phylogenetic comparative methods depends on the significance of the phylogenetic signal, a measure of the correlation between the evolution of the analyzed trait and the presumed phylogenetic tree. We first measured the phylogenetic signals of the analyzed traits for the 681 bacteria and 155 archaea obtained from the database TEMPURA (Sato et al. 2020). As shown in table 1, all the  $\lambda$  values are close to one, which indicates that simple statistical analysis that does not account for common ancestry's effect would lead to inaccurate results (Felsenstein 1985; Symonds and Blomberg 2014).

### Bacterial but not archaeal genomic GC contents correlated with growth temperatures

We used the phylogenetic generalized least squares (PGLS) regression to examine the relationships between GC contents and growth temperatures. The significant positive and negative slopes of the

regressions correspond to significant positive and negative correlations, respectively. Four phylogenetic models, the Brownian motion model (BM), the Ornstein-Uhlenbeck model with an ancestral state to be estimated at the root (OUfixedRoot), the Pagel's lambda model (lambda), and the early burst model (EB), have been applied in the analysis. Their results are qualitatively identical and quantitatively similar. Therefore, we present the BM model results in the main text and deposit other models' results as supplementary tables.

Consistent with the numerous previous studies, we found positive correlations between the GC contents of structural RNA genes and growth temperature in bacteria and archaea (Table 2). We noticed a rank in the slope values, from  $T_{max}$ ,  $T_{opt}$ , to  $T_{min}$ .

Unlike previous influential studies (Galtier and Lobry 1997; Hurst and Merchant 2001), we also found positive correlations of  $T_{max}$  and  $T_{opt}$  with various indexes of genomic GC contents,  $GC_w$ ,  $GC_p$ ,  $GC_4$ , and  $GC_{non}$ , in bacteria (Table 2). Nevertheless, bacterial  $T_{min}$  is not correlated with three of the four GC content indexes (Table 2). In archaea, none of the three temperature indexes ( $T_{max}$ ,  $T_{opt}$ , or  $T_{min}$ ) have any significant correlations with any of the four genomic GC content indexes (Table 2).

If growth temperature could shape GC contents by the stabilities of RNA secondary structures and DNA double helix, a structural RNA or a DNA double helix that is stable at the  $T_{max}$  or  $T_{opt}$  is, of course, stable at the  $T_{min}$ . In this logic, it is reasonable to see that the  $T_{min}$  has weaker or no significant correlations with GC contents.

The difference in the correlations between bacteria and archaea might be attributed to either unknown intrinsic differences between these two domains or the significant difference in the sample size, 681 vs. 155.

### Sample sizes matter

If the lack of significant correlations between genomic DNA and  $T_{max}$  and  $T_{opt}$  in archaea results from the small sample size, the correlations in bacteria will be lost when the sample size of bacteria is reduced to 155. For this reason, we randomly selected 155 bacteria from the 681 bacterial samples for 1000 rounds. The results of resampling analysis confirmed the idea, the sample sizes matter (Table 3). In > 950 rounds, the genomic GC content indexes ( $GC_w$ ,  $GC_p$ ,  $GC_4$ , and  $GC_{non}$ ) are not correlated with  $T_{max}$  or  $T_{opt}$  ( $P > 0.05$ ). This result could also explain the difference of the present study with Hurst and Merchant (2001), which did not found significant correlations between  $GC_w/GC_3$  and  $T_{opt}$  by phylogenetic analysis of about 100 prokaryotes. Meanwhile, a few positive correlation cases happen, indicating that significant positive correlations could also be found by chance when the analyzed sample is small.

Besides, we noticed that the correlations between growth temperature and the GC contents of structural RNA genes might also be lost occasionally when the sample size is severely reduced (Table 3). In the 1000 rounds of resampling, lacking significant correlations happen in 308 (for  $T_{max}$ ) and 473 (for  $T_{opt}$ ) rounds in 5S rRNA genes, and 12 (for  $T_{max}$ ) and 21 (for  $T_{opt}$ ) rounds in tRNA genes.

However, in the 16S and 23S rRNA genes, positive correlations were consistently observed in all the 1000 rounds of resampling. We suspected that the tens of times more nucleotides in 16S and 23S rRNA than 5S rRNA make the results of 16S and 23S rRNAs less sensitive to small sample sizes.

In statistics, the rule of thumb boundary between small and large samples is  $n = 30$ . However, the results in Table 3 indicate that  $n = 155$  is a too-small sample in the phylogenetic comparative analyses of the correlation between growth temperature and genomic GC content. Because of the common ancestor, two closely related lineages with highly similar growth temperatures and GC contents should be regarded as nearly one effective sample rather than two independent samples. The effective sample size should be much lower than the census number of the analyzed lineages.

### **Qualitative data on growth temperature lead to the same conclusion**

In the ProTraits database (<http://protraits.irb.hr/>) and the IMG database (<https://img.jgi.doe.gov/>) (Brbić et al. 2016; Chen et al. 2020), many prokaryotes lack quantitative measures of growth temperature but are qualitatively classified into four categories: psychrophiles/psychrotrophiles, mesophiles, thermophiles, and hyperthermophiles. We constructed a qualitative dataset of prokaryote growth temperature, including data downloaded from these two datasets and the prokaryotes in the TEMPURA database classified into the four categories referring (Sato et al. 2020). By assigning 1, 2, 3, and 4 to the psychrophiles/psychrotrophiles, mesophiles, thermophiles, and hyperthermophiles, respectively, we transformed the qualitative characters into numerical values. PGLS regression analyses revealed a positive correlation between GC content and growth temperature in bacteria (slope = 0.457,  $P = 0.001$ ), but not in archaea (slope = -0.582,  $P = 0.170$ ). Although this dataset (4696 bacteria and 279 archaea) is much larger than analyzed above (681 bacteria and 155 archaea), it lost much information during the qualitative classification. All the differences in growth temperature within each category disappear.

We also examined whether the contrast in the temperature category is correlated with the contrast in the GC content between terminal tips of the phylogenetic tree by referring (Aslam et al. 2019). In total, 273 pairs of bacteria and 41 pairs of archaea were obtained from the phylogenetic tree (Parks et al. 2020). Pairwise comparison showed significantly higher GC contents in the bacteria with higher rank in growth temperature (Wilcoxon signed rank test,  $P = 0.019$ ). Still, no significant differences were observed between archaea with different growth temperature ranks (Wilcoxon signed rank test,  $P = 0.446$ ).

### **Positive correlations observed in genes of both chromosomes and plasmids**

Previous studies showed a significant difference in the GC content between plasmids and chromosomes, with significantly lower GC contents in the plasmids (Rocha and Danchin 2002; Nishida 2012; Dietel et al. 2019). Therefore, we examined the correlations between growth temperatures and GC contents separately in chromosomes and plasmids. The separations of plasmids



and chromosomes are arbitrary. We strictly followed the definitions of chromosomes and plasmids of the NCBI genome database (<ftp://ftp.ncbi.nlm.nih.gov/genomes/>). Among the 681 bacteria and 155 archaea analyzed above, 172 bacteria and 42 archaea have plasmid genomes. The bacterial chromosomes also have GC contents ( $GC_w$ ,  $GC_p$ ,  $GC_4$ , and  $GC_{non}$ ) positively correlated with  $T_{max}$  and  $T_{opt}$  (Table 4). Interestingly, the same pattern was also found in the bacterial plasmids (Table 4) in spite that the correlations of  $T_{max}$  with  $GC_4$  and  $GC_{non}$  are just significant at marginal levels ( $0.05 < P < 0.1$ ). All these correlations are not significant in archaea.

In the two previous studies comparing the GC content between plasmids and chromosomes (Rocha and Danchin 2002; Nishida 2012), the common ancestor effect was not accounted for. By the way, we performed a phylogenetic paired t-test (Lindenfors et al. 2010) and confirmed the pattern of lower GC content in plasmids (Table S8).

### Positive correlations observed in both core genes and accessory genes

To correspond to the previous gene-centered studies (Ream et al. 2003; 2010), we examined the correlations in bacterial core genes, i.e., genes present in all the bacteria. With the increase in the number of bacteria, the number of core genes decreases rapidly. With a trade-off between the number of core genes and the number of bacteria, we selected 28 core genes present in 420 genomes, mostly ribosomal protein genes. Significant positive correlations have been found between GC contents ( $GC_p$  and  $GC_4$ ) and growth temperatures,  $T_{max}$ , and  $T_{opt}$  (Table 5).

At the opposite side of the core genes, the accessory genes present in one or a few bacteria. When we define the accessory genes as the genes present in less than 5% of the analyzed bacterial genomes, on average, each bacterium has 152 accessory genes. Positive correlations were observed between GC contents ( $GC_p$  and  $GC_4$ ) and growth temperatures ( $T_{max}$  and  $T_{opt}$ ), although the values of significance are slightly larger than those in core genes (Table 5). Similar patterns were observed when we increased the threshold in defining accessory genes to 10% ( $P < 0.05$  for all cases).

A previous analysis of 36 prokaryotes showed that the core genomes have a significantly higher GC content than accessory genomes (Bohlin et al. 2017). However, this study did not account for the effect of common ancestors. Using a phylogenetic paired t-test (Lindenfors et al. 2010), we did not observe significant differences between the core genes and the accessory genes (Table S15). We also compared the chromosomal accessory genes and plasmid accessory genes using the phylogenetic paired t-test. The accessory genes on chromosomes have significantly higher GC contents than those on plasmids (Table S16).

### Discussion

The GC pairs are thermally more stable than AT pairs in both DNA double helix and structural RNAs. However, the difference is not necessarily a strong enough force to shape the evolution of GC content. As RNA structures are more sensitive to the elevation of temperature than DNA double helix, the

growth temperature is stronger in shaping the GC content evolution of the structural RNA genes than in shaping the genomic GC content evolution. Positive correlations between growth temperature and the GC content of structural RNA genes have been repeatedly observed in various prokaryotic studies (Galtier and Lobry 1997; Hurst and Merchant 2001; Khachane et al. 2005; Kimura et al. 2006; Kimura et al. 2007; Kimura et al. 2013; Sato et al. 2020). However, there was a long debate on the correlation between growth temperature and genomic GC content. Benefit from a new manual-curated dataset of prokaryotic growth temperature (Sato et al. 2020), we performed a phylogenetic comparative analysis with a much larger sample than previous studies (Hurst and Merchant 2001; Musto et al. 2004). In 681 bacteria, the genomic GC contents, no matter  $GC_w$ ,  $GC_p$ ,  $GC_4$ , or  $GC_{non}$ , are positively correlated with growth temperatures,  $T_{max}$  and  $T_{opt}$ . However, in 155 archaea, there are no significant correlations. Then, we resampled 155 bacteria from the 682 bacteria for 1000 rounds. In most cases, the significant positive correlations between genomic GC contents and growth temperatures disappeared. The resampling analysis indicates that the small sample sizes of the previous studies might lead to the lack of significant correlations. It is effortless to increase the sample size several times if accurate phylogenetic relationships are not considered in the analysis. As shown in Table 1, we found that both growth temperatures and GC contents exhibit powerful phylogenetic signals. Overlooking the effect of common ancestors would severely affect the accuracy of the results (Felsenstein 1985).

Our resampling analysis indicates that the lack of significant correlations in archaea might result from the small number of effective samples. We hope to repeat the present study in the future with a larger sample of archaeal genomes. However, it should also be kept in mind that the possibility of no correlation between GC content and growth temperature has not been convincingly excluded. Some intrinsic differences between bacteria and archaea might produce a sharp difference in the correlation between GC content and growth temperature. Most prokaryotes have negatively supercoiled DNA, whereas the prokaryotes that grow at temperatures higher than 80°C (mostly archaea) generally have their genomic DNA positively supercoiled with a particular enzyme, reverse gyrase (Vettone et al. 2014). A high level of supercoiling might stabilize the DNA double helix at high temperatures and relieve the high GC content requirement.

A recent study suggests that sequential amino acid substitutions are involved in the thermoadaptation in the archaeal order *Methanococcales* and revealed arginine as the most favoured amino acid (Lecocq et al. 2020). As six GC-rich codons encode the arginine, the thermoadaptation at the proteomic level would affect the evolution of genomic GC content. As the 4-fold degenerate sites are free from the evolutionary forces coming from the natural selection acting on protein sequences, our observations of similar correlations of  $GC_w$ ,  $GC_p$  and  $GC_4$  with growth temperature indicate that the nucleotide composition evolved independently in bacterial adaptation to high temperature.

As the frequent gain and loss of plasmids, the plasmid DNAs could be regarded as accessory genomes. Because of the high turnover rates of plasmids and accessory genes in prokaryotic evolution, we could regard them as new immigrants, as opposed to the natives for the chromosomes and core



genes. Although the core genes and even the ribosomal RNA genes may occasionally be transferred across different prokaryotic lineages (Tian et al. 2015; Sato and Miyazaki 2017), the fitness cost of inter-species replacement of homologous sequences (Bershtein et al. 2015) restricts the frequency of the core genes. Genes encoding proteins that carry out essential informational tasks in the cell are less transferable across lineages (Jain et al. 1999; Kacar et al. 2017). Our phylogenetic correlation analysis showed that positive correlations between GC contents and growth temperatures exist in chromosomes and core genes and exist in plasmids and accessory genes. Also, there is no sharp difference in the correlations between the new immigrants and the natives.

In large-scale analyses of horizontal gene transfer in prokaryotes, GC-content similarity between donor and recipient was found to be one factor, or one of the factors, governing the compatibility of the new immigrants in new hosts (Popa et al. 2011; Porse et al. 2018). The effect of promoter GC content on the expression of the new immigrants was suggested to be the underlying mechanism governing the compatibility (Gomes et al. 2020). Here, we suggest that the temperature-associated structural stabilities, including the stability of DNA double helix, the stability of the transient DNA-RNA duplex during transcription, and maybe the stability of the possible secondary structures of mature mRNA (Basak et al. 2010), might be another nonexclusive factor governing the compatibility.

Previous analyses that did not account for the common ancestor effect showed that chromosomes and core genes have higher GC contents than plasmids and accessory genes, respectively (Rocha and Danchin 2002; Nishida 2012; Bohlin et al. 2017). Our phylogenetic paired t-tests found significant differences between chromosomes and plasmid, but not between core genes and accessory genes. Furthermore, we found that the chromosomal accessory genes have significantly higher GC content than plasmid accessory genes. Bacterial cells usually have multiple copies of plasmids, which coincide with higher maintenance costs (Rocha and Danchin 2002; Dietel et al. 2018; Dietel et al. 2019). We suspected that it is the cost resulting from the high copy number that leads to the GC content difference between the chromosomal accessory genes and plasmid accessory genes. Despite this difference, the GC contents of both plasmids and accessory genes are positively correlated with growth temperature. The new immigrants compatible with the host have a GC content adapted to the host's growth temperature.

A previous serial transfer experiment seems to be contradictory to our results. Increased genomic GC content was not observed in the bacterium *P. multocida* after 14,400 generations of increasing temperature from 37°C to 45°C (Xia et al. 2002). Although we observed a positive correlation between genomic GC content and growth temperature, we do not think a small increment in GC content, resulting from either a GC-biased mutator or integration of a GC-rich exogenous sequence, would bring a great advantage to the host organisms. Most likely, it is just a slight advantage. According to the population genetic theory, the slightly beneficial mutants will be efficiently selected only when they are in a large population. The experimental evolution generally involves severe, periodic reductions in population size, and the bottleneck effect dramatically reduces the fixation probability of

beneficial mutations (Wahl et al. 2002). As we see, large-scale statistical analysis has the advantage of revealing slightly beneficial traits.

Finally, we should remark that what we observed are just correlations between GC content and growth temperature, which imply rather than prove the causal effects between the two variables. Besides the thermal adaptation hypothesis (Bernardi and Bernardi 1986), we should be open to other intricate explanations for the observed correlations.

## Materials and Methods

We downloaded the prokaryote growth temperatures from the database TEMPURA (Sato et al. 2020). This database contains 8,639 manual curated strains (549 archaea and 8090 bacteria). Using the links to the NCBI Taxonomy database (Federhen 2012) and the taxonomy IDs provided by TEMPURA for each prokaryotic strain, we obtained 1110 prokaryotes whose genome assembly levels were labeled as "complete" from the NCBI database (Sayers et al. 2021). Among them, we found the phylogenetic information for 682 bacteria and 156 archaea from GTDB (Genome Taxonomy Database) (Parks et al. 2020). The sequences of these genomes were downloaded from <ftp://ftp.ncbi.nlm.nih.gov/genomes/>. To avoid annotation bias resulting from different methods, all the genomes were re-annotated using the DFAST, version 1.2.11, with its default parameters (Tanizawa et al. 2018). In total, we obtained the annotations for 681 bacterial genomes and 155 archaeal genomes. The GC contents of these prokaryotes were calculated from these genome sequences.

We also constructed a large dataset according to their growth temperature qualitatively. First, we divided the 836 prokaryotes mentioned above into four categories according to their growth temperature referring to (Sato et al. 2020): psychrophiles/psychrotrophiles ( $T_{opt} < 20^{\circ}\text{C}$ ), mesophiles ( $20 \leq T_{opt} < 45^{\circ}\text{C}$ ), thermophiles ( $45 \leq T_{opt} < 80^{\circ}\text{C}$ ), and hyperthermophiles ( $80^{\circ}\text{C} \leq T_{opt}$ ). Then, we downloaded the lists of prokaryotes labeled with psychrophiles/psychrotrophiles, mesophiles, thermophiles, or hyperthermophiles from the ProTraits database (<http://protraits.irb.hr/>) and the IMG database (<https://img.jgi.doe.gov/>) (Brbić et al. 2016; Chen et al. 2020). After discarding the overlapping items, the conflicting items, and the items lacking phylogenetic information in the GTDB database (Parks et al. 2020), we obtained a new dataset including 4696 bacteria and 279 archaea (Table S17). The whole-genome GC contents of these prokaryotes were downloaded directly from the NCBI genome database ([https://ftp.ncbi.nlm.nih.gov/genomes/GENOME\\_REPORTS/prokaryotes.txt](https://ftp.ncbi.nlm.nih.gov/genomes/GENOME_REPORTS/prokaryotes.txt)).

The phylogenetic signals ( $\lambda$ ) of both GC contents and growth temperatures were estimated using the phylosig function of the R (Version 4.0.3) package phytools (Version 0.7-70) (Revell 2012). The PGLS regression was performed using the R (Version 4.0.3) package phylolm (version 2.6.2) (Ho and Ane 2014).

To avoid false-positive results that might happen in multiple correlation analyses of the same dataset, we controlled the false discovery rate by the Benjamini-Hochberg (BH) procedure using the p.adjust function in R (Version 4.0.3).

## Supplementary Material

Supplementary data are submitted along with the main text.

## Acknowledgments

This work was supported by the National Natural Science Foundation of China (grant number 31671321).

## Author Contributions

DKN conceived the study and wrote the manuscript. EZH, XRL, ZLL, and JG performed the data analysis. MYM and DKN All authors read, improved, and approved the final manuscript.

## References

- Agashe D, Shankar N. 2014. The evolution of bacterial DNA base composition. *J Exp Zool Part B* 322:517-528.
- Aslam S, Lan X-R, Zhang B-W, Chen Z-L, Wang L, Niu D-K. 2019. Aerobic prokaryotes do not have higher GC contents than anaerobic prokaryotes, but obligate aerobic prokaryotes have. *BMC Evol Biol* 19:35.
- Basak S, Mandal S, Ghosh TC. 2005. Correlations between genomic GC levels and optimal growth temperatures: some comments. *Biochem Biophys Res Commun* 327:969-970.
- Basak S, Mukhopadhyay P, Gupta SK, Ghosh TC. 2010. Genomic adaptation of prokaryotic organisms at high temperature. *Bioinformatics* 4:352-356.
- Bernardi G, Bernardi G. 1986. Compositional constraints and genome evolution. *J Mol Evol* 24:1-11.
- Bershtein S, Serohijos AWR, Bhattacharyya S, Manhart M, Choi J-M, Mu W, Zhou J, Shakhnovich EI. 2015. Protein homeostasis imposes a barrier on functional integration of horizontally transferred genes in bacteria. *PLoS Genet* 11:e1005612.
- Blais C, Archibald JM. 2021. The past, present and future of the tree of life. *Curr Biol* 31:R314-R321.
- Bohlin J, Eldholm V, Pettersson JHO, Brynildsrud O, Snipen L. 2017. The nucleotide composition of microbial genomes indicates differential patterns of selection on core and accessory genomes. *BMC Genomics* 18:151.
- Brbić M, Piškorec M, Vidulin V, Kriško A, Šmuc T, Supek F. 2016. The landscape of microbial phenotypic traits and associated genes. *Nucleic Acids Res* 44:10074-10090.
- Chen I-MA, Chu K, Palaniappan K, Ratner A, Huang J, Huntemann M, Hajek P, Ritter S, Varghese N, Seshadri R, et al. 2020. The IMG/M data management and analysis system v.6.0: new tools and advanced capabilities. *Nucleic Acids Res* 49:D751-D763.
- DeSalle R, Riley M. 2020. Should networks supplant tree building? *Microorganisms* 8.
- Dietel A-K, Merker H, Kaltenpoth M, Kost C. 2019. Selective advantages favour high genomic AT-contents in intracellular elements. *PLoS Genet* 15:e1007778.
- Dietel AK, Kaltenpoth M, Kost C. 2018. Convergent evolution in intracellular elements

plasmids as model endosymbionts. *Trends Microbiol* 26:755-768.

Federhen S. 2012. The NCBI Taxonomy database. *Nucleic Acids Res* 40:D136-D143.

Felsenstein J. 1985. Phylogenies and the comparative method. *Am Nat* 125:1-15.

Foerstner KU, von Mering C, Hooper SD, Bork P. 2005. Environments shape the nucleotide composition of genomes. *EMBO Rep* 6:1208-1213.

Galtier N, Lobry JR. 1997. Relationships between genomic G+C content, RNA secondary structures, and optimal growth temperature in prokaryotes. *J Mol Evol* 44:632-636.

Glemin S, Clement Y, David J, Ressayre A. 2014. GC content evolution in coding regions of angiosperm genomes: a unifying hypothesis. *Trends Genet* 30:263-270.

Gomes ALC, Johns NI, Yang A, Velez-Cortes F, Smillie CS, Smith MB, Alm EJ, Wang HH. 2020. Genome and sequence determinants governing the expression of horizontally acquired DNA in bacteria. *ISME J* 14:2347-2357.

Hildebrand F, Meyer A, Eyre-Walker A. 2010. Evidence of selection upon genomic GC-content in bacteria. *PLoS Genet* 6:e1001107.

Ho LST, Ane C. 2014. A linear-time algorithm for Gaussian and non-Gaussian trait evolution models. *Syst Biol* 63:397-408.

Hurst LD, Merchant AR. 2001. High guanine-cytosine content is not an adaptation to high temperature: a comparative analysis amongst prokaryotes. *Proc R Soc B* 268:493-497.

Jain R, Rivera MC, Lake JA. 1999. Horizontal gene transfer among genomes: The complexity hypothesis. *Proc Natl Acad Sci USA* 96:3801-3806.

Kacar B, Garmendia E, Tuncbag N, Andersson DI, Hughes D. 2017. Functional constraints on replacing an essential gene with its ancient and modern homologs. *mBio* 8:e01276-01217.

Kagawa Y, Nojima H, Nukiwa N, Ishizuka M, Nakajima T, Yasuhara T, Tanaka T, Oshima T. 1984. High guanine plus cytosine content in the third letter of codons of an extreme thermophile. DNA sequence of the isopropylmalate dehydrogenase of *Thermus thermophilus*. *The Journal of biological chemistry* 259:2956-2960.

Khachane AN, Timmis KN, dos Santos VAPM. 2005. Uracil content of 16S rRNA of thermophilic and psychrophilic prokaryotes correlates inversely with their optimal growth temperatures. *Nucleic Acids Res* 33:4016-4022.

Kimura H, Ishibashi J-I, Masuda H, Kato K, Hanada S. 2007. Selective phylogenetic analysis targeting 16S rRNA genes of hyperthermophilic archaea in the deep-subsurface hot biosphere. *Appl Environ Microbiol* 73:2110-2117.

Kimura H, Mori K, Yamanaka T, Ishibashi J-I. 2013. Growth temperatures of archaeal communities can be estimated from the guanine-plus-cytosine contents of 16S rRNA gene fragments. *Env Microbiol Rep* 5:468-474.

Kimura H, Sugihara M, Kato K, Hanada S. 2006. Selective phylogenetic analysis targeted at 16S rRNA genes of thermophiles and hyperthermophiles in deep-subsurface geothermal environments. *Appl Environ Microbiol* 72:21-27.

Koonin EV. 2015. The turbulent network dynamics of microbial evolution and the statistical tree of life. *J Mol Evol* 80:244-250.

Lecocq M, Groussin M, Gouy M, Brochier-Armanet C. 2020. The molecular determinants of thermoadaptation: *Methanococcales* as a case study. *Mol Biol Evol*.

Lindenfors P, Revell LJ, Nunn CL. 2010. Sexual dimorphism in primate aerobic capacity: a phylogenetic test. *J Evol Biol* 23:1183-1194.

455 Mann S, Chen YPP. 2010. Bacterial genomic G plus C composition-eliciting environmental  
456 adaptation. *Genomics* 95:7-15.

457 Marashi S-A, Ghalanbor Z. 2004. Correlations between genomic GC levels and optimal growth  
458 temperatures are not 'robust'. *Biochem Biophys Res Commun* 325:381-383.

459 Meyer MM. 2021. Revisiting the relationships between genomic G plus C content, RNA  
460 secondary structures, and optimal growth temperature. *J Mol Evol* 89:165-171.

461 Musto H, Naya H, Zavala A, Romero H, Alvarez-Valin F, Bernardi G. 2005. The correlation  
462 between genomic G+C and optimal growth temperature of prokaryotes is robust: A reply to  
463 Marashi and Ghalanbor. *Biochem Biophys Res Commun* 330:357-360.

464 Musto H, Naya H, Zavala A, Romero H, Alvarez-Valin F, Bernardi G. 2004. Correlations  
465 between genomic GC levels and optimal growth temperatures in prokaryotes. *FEBS Lett*  
466 573:73-77.

467 Musto H, Naya H, Zavala A, Romero H, Alvarez-Valin F, Bernardi G. 2006. Genomic GC level,  
468 optimal growth temperature, and genome size in prokaryotes. *Biochem Biophys Res Commun*  
469 347:1-3.

470 Nguyen DT, Wu B, Xiao S, Hao W. 2020. Evolution of a record-setting AT-rich genome: indel  
471 mutation, recombination, and substitution bias. *Genome Biol Evol* 12:2344-2354.

472 Nishida H. 2012. Comparative analyses of base compositions, DNA sizes, and dinucleotide  
473 frequency profiles in archaeal and bacterial chromosomes and plasmids. *Int J Evol Biol*  
474 2012:342482.

475 Parks DH, Chuvochina M, Chaumeil PA, Rinke C, Mussig AJ, Hugenholtz P. 2020. A complete  
476 domain-to-species taxonomy for Bacteria and Archaea. *Nat Biotechnol* 38:1079-1086.

477 Popa O, Hazkani-Covo E, Landan G, Martin W, Dagan T. 2011. Directed networks reveal  
478 genomic barriers and DNA repair bypasses to lateral gene transfer among prokaryotes. *Genome*  
479 *Res* 21:599-609.

480 Porse A, Schou TS, Munck C, Ellabaan MMH, Sommer MOA. 2018. Biochemical mechanisms  
481 determine the functional compatibility of heterologous genes. *Nat Commun* 9:522.

482 Raghavan R, Kelkar YD, Ochman H. 2012. A selective force favoring increased G+C content  
483 in bacterial genes. *Proc Natl Acad Sci USA* 109:14504-14507.

484 Ream RA, Johns GC, Somero GN. 2003. Base compositions of genes encoding alpha-actin and  
485 lactate dehydrogenase-A from differently adapted vertebrates show no temperature-adaptive  
486 variation in G+C content. *Mol Biol Evol* 20:105-110.

487 Reichenberger ER, Rosen G, Hershberg U, Hershberg R. 2015. Prokaryotic nucleotide  
488 composition is shaped by both phylogeny and the environment. *Genome Biol Evol* 7:1380-1389.

489 Revell LJ. 2012. phytools: an R package for phylogenetic comparative biology (and other  
490 things). *Methods in Ecology and Evolution* 3:217-223.

491 Rocha EPC, Danchin A. 2002. Base composition bias might result from competition for  
492 metabolic resources. *Trends Genet* 18:291-294.

493 Sato M, Miyazaki K. 2017. Phylogenetic network analysis revealed the occurrence of horizontal  
494 gene transfer of 16S rRNA in the genus *Enterobacter*. *Front Microbiol* 8:10.

495 Sato Y, Okano K, Kimura H, Honda K. 2020. TEMPURA: database of growth TEMPeratures  
496 of Usual and RAre Prokaryotes. *Microbes and Environments* 35:ME20074.

497 Sayers EW, Beck J, Bolton EE, Bourexis D, Brister JR, Canese K, Comeau DC, Funk K, Kim  
498 S, Klimke W, et al. 2021. Database resources of the National Center for Biotechnology



Information. *Nucleic Acids Res* 49:D10-D17.

Šmarda P, Bureš P, Horová L, Leitch IJ, Mucina L, Pacini E, Tichý L, Grulich V, Rotreklová O. 2014. Ecological and evolutionary significance of genomic GC content diversity in monocots. *Proc Natl Acad Sci USA* 111:E4096-E4102.

Symonds MRE, Blomberg SP. 2014. A primer on phylogenetic generalised least squares. In: Garamszegi LZ, editor. *Modern Phylogenetic Comparative Methods and Their Application in Evolutionary Biology: Concepts and Practice*. Berlin, Heidelberg: Springer Berlin Heidelberg. p. 105-130.

Tanizawa Y, Fujisawa T, Nakamura Y. 2018. DFAST: a flexible prokaryotic genome annotation pipeline for faster genome publication. *Bioinformatics* 34:1037-1039.

Tian R-M, Cai L, Zhang W-P, Cao H-L, Qian P-Y. 2015. Rare events of intragenus and intraspecies horizontal transfer of the 16S rRNA gene. *Genome Biol Evol* 7:2310-2320.

Vettone A, Perugino G, Rossi M, Valenti A, Ciaramella M. 2014. Genome stability: recent insights in the topoisomerase reverse gyrase and thermophilic DNA alkyltransferase. *Extremophiles* 18:895-904.

Wahl LM, Gerrish PJ, Saika-Voivod I. 2002. Evaluating the impact of population bottlenecks in experimental evolution. *Genetics* 162:961-971.

Wang H-C, Susko E, Roger AJ. 2006. On the correlation between genomic G+C content and optimal growth temperature in prokaryotes: Data quality and confounding factors. *Biochem Biophys Res Commun* 342:681-684.

Weissman JL, Fagan WF, Johnson PLF. 2019. Linking high GC content to the repair of double strand breaks in prokaryotic genomes. *PLoS Genet* 15:e1008493.

Winter G, Koch GLE, Hartley BS, Barker DG. 1983. The amino acid sequence of the tyrosyl-tRNA synthetase from *Bacillus stearothermophilus*. *Eur J Biochem* 132:383-387.

Wu H, Zhang Z, Hu S, Yu J. 2012. On the molecular mechanism of GC content variation among eubacterial genomes. *Biol Direct* 7:2.

Xia X, Wei T, Xie Z, Danchin A. 2002. Genomic changes in nucleotide and dinucleotide frequencies in *Pasteurella multocida* cultured under high temperature. *Genetics* 161:1385-1394.

Zheng H, Wu H. 2010. Gene-centric association analysis for the correlation between the guanine-cytosine content levels and temperature range conditions of prokaryotic species. *BMC Bioinformatics* 11:S7.



Table 1. The phylogenetic signals of the variables analyzed in this study.

| Traits             | Bacteria |                   |                        | Archaea  |                   |                       |
|--------------------|----------|-------------------|------------------------|----------|-------------------|-----------------------|
|                    | <i>n</i> | Pagel's $\lambda$ | <i>P</i>               | <i>n</i> | Pagel's $\lambda$ | <i>P</i>              |
| Tmax               | 681      | 0.957             | $3.5 \times 10^{-178}$ | 155      | 1.000             | $1.5 \times 10^{-72}$ |
| Topt,              | 681      | 0.950             | $1.1 \times 10^{-196}$ | 155      | 0.988             | $5.7 \times 10^{-70}$ |
| Tmin               | 681      | 0.933             | $6.6 \times 10^{-152}$ | 155      | 0.966             | $1.9 \times 10^{-53}$ |
| GC <sub>w</sub>    | 681      | 1.000             | $2.6 \times 10^{-294}$ | 155      | 1.000             | $5.8 \times 10^{-60}$ |
| GC <sub>p</sub>    | 681      | 1.000             | $4.7 \times 10^{-292}$ | 155      | 1.000             | $2.4 \times 10^{-59}$ |
| GC <sub>4</sub>    | 681      | 1.000             | $4.8 \times 10^{-238}$ | 155      | 1.000             | $5.1 \times 10^{-53}$ |
| GC <sub>non</sub>  | 681      | 1.000             | $8.6 \times 10^{-305}$ | 155      | 1.000             | $2.0 \times 10^{-65}$ |
| GC <sub>tRNA</sub> | 681      | 0.998             | $6.0 \times 10^{-275}$ | 155      | 1.000             | $2.1 \times 10^{-91}$ |
| GC <sub>5S</sub>   | 646      | 1.000             | $7.0 \times 10^{-178}$ | 130      | 1.000             | $9.1 \times 10^{-51}$ |
| GC <sub>16S</sub>  | 681      | 0.999             | $8.7 \times 10^{-250}$ | 155      | 0.996             | $3.7 \times 10^{-86}$ |
| GC <sub>23S</sub>  | 681      | 1.000             | $2.1 \times 10^{-245}$ | 155      | 1.000             | $6.8 \times 10^{-83}$ |

Tmax, Topt, and Tmin represent maximal, optimal, and minimal growth temperature, respectively; GC<sub>w</sub>, GC<sub>p</sub>, GC<sub>4</sub>, GC<sub>tRNA</sub>, GC<sub>5S</sub>, GC<sub>16S</sub>, GC<sub>23S</sub>, and GC<sub>non</sub> represent the GC contents of the genome, the protein-coding sequences, the fourfold degenerate sites, the genes coding tRNAs, the genes coding 5S rRNA, the genes coding 16S rRNA, the genes coding 23S rRNA, and the non-coding DNA (including intergenic sequences and untranslated regions of mRNA), respectively. The phylogenetic signals of the chromosomal genes, the plasmid genes, the core genes, and the accessory genes are also very close to one and deposited in supplementary Table S1-S4.

Table 2. PGLS analysis of GC contents and growth temperatures.

|                          | Bacteria             |                       |                       | Archaea              |                       |                       |
|--------------------------|----------------------|-----------------------|-----------------------|----------------------|-----------------------|-----------------------|
|                          | Slope                | $P$                   | $P_{BH}$              | Slope                | $P$                   | $P_{BH}$              |
| GC <sub>w</sub> -Tmax    | $7.1 \times 10^{-4}$ | $7.1 \times 10^{-4}$  | $9.4 \times 10^{-4}$  | $6.6 \times 10^{-4}$ | 0.115                 | 0.153                 |
| GC <sub>w</sub> -Topt    | $5.7 \times 10^{-4}$ | 0.009                 | 0.011                 | $3.3 \times 10^{-4}$ | 0.377                 | 0.503                 |
| GC <sub>w</sub> -Tmin    | $2.8 \times 10^{-4}$ | 0.156                 | 0.226                 | $5.2 \times 10^{-4}$ | 0.126                 | 0.168                 |
| GC <sub>p</sub> -Tmax    | $6.6 \times 10^{-4}$ | 0.002                 | 0.002                 | $5.6 \times 10^{-4}$ | 0.183                 | 0.209                 |
| GC <sub>p</sub> -Topt    | $5.3 \times 10^{-4}$ | 0.015                 | 0.016                 | $2.4 \times 10^{-4}$ | 0.522                 | 0.597                 |
| GC <sub>p</sub> -Tmin    | $2.5 \times 10^{-4}$ | 0.202                 | 0.231                 | $4.6 \times 10^{-4}$ | 0.180                 | 0.205                 |
| GC <sub>4</sub> -Tmax    | 0.001                | 0.003                 | 0.003                 | $9.9 \times 10^{-4}$ | 0.321                 | 0.321                 |
| GC <sub>4</sub> -Topt    | 0.001                | 0.016                 | 0.016                 | $2.2 \times 10^{-4}$ | 0.806                 | 0.806                 |
| GC <sub>4</sub> -Tmin    | $5.5 \times 10^{-4}$ | 0.239                 | 0.239                 | $6.9 \times 10^{-4}$ | 0.393                 | 0.393                 |
| GC <sub>non</sub> -Tmax  | $8.0 \times 10^{-4}$ | $1.7 \times 10^{-4}$  | $2.8 \times 10^{-4}$  | $9.1 \times 10^{-4}$ | 0.025                 | 0.041                 |
| GC <sub>non</sub> -Topt  | $6.4 \times 10^{-4}$ | 0.004                 | 0.006                 | $6.4 \times 10^{-4}$ | 0.080                 | 0.129                 |
| GC <sub>non</sub> -Tmin  | $2.7 \times 10^{-4}$ | 0.170                 | 0.226                 | $6.5 \times 10^{-4}$ | 0.048                 | 0.077                 |
| GC <sub>tRNA</sub> -Tmax | $4.1 \times 10^{-4}$ | $2.2 \times 10^{-16}$ | $5.9 \times 10^{-16}$ | $7.1 \times 10^{-4}$ | $1.8 \times 10^{-11}$ | $7.2 \times 10^{-11}$ |
| GC <sub>tRNA</sub> -Topt | $3.9 \times 10^{-4}$ | $2.6 \times 10^{-14}$ | $6.9 \times 10^{-14}$ | $5.0 \times 10^{-4}$ | $2.5 \times 10^{-7}$  | $6.7 \times 10^{-7}$  |
| GC <sub>tRNA</sub> -Tmin | $1.5 \times 10^{-4}$ | $9.1 \times 10^{-4}$  | 0.002                 | $4.2 \times 10^{-4}$ | $1.8 \times 10^{-6}$  | $4.7 \times 10^{-6}$  |
| GC <sub>5S</sub> -Tmax   | $5.5 \times 10^{-4}$ | $1.2 \times 10^{-6}$  | $2.4 \times 10^{-6}$  | 0.001                | $1.9 \times 10^{-5}$  | $3.9 \times 10^{-5}$  |
| GC <sub>5S</sub> -Topt   | $4.4 \times 10^{-4}$ | $1.4 \times 10^{-4}$  | $2.9 \times 10^{-4}$  | $8.9 \times 10^{-4}$ | $1.6 \times 10^{-4}$  | $3.2 \times 10^{-4}$  |
| GC <sub>5S</sub> -Tmin   | $3.5 \times 10^{-4}$ | 0.001                 | 0.002                 | $6.1 \times 10^{-4}$ | 0.005                 | 0.010                 |
| GC <sub>16S</sub> -Tmax  | $5.4 \times 10^{-4}$ | $2.2 \times 10^{-16}$ | $5.9 \times 10^{-16}$ | $8.2 \times 10^{-4}$ | $3.9 \times 10^{-11}$ | $1.0 \times 10^{-10}$ |
| GC <sub>16S</sub> -Topt  | $5.2 \times 10^{-4}$ | $2.2 \times 10^{-16}$ | $8.8 \times 10^{-16}$ | $7.2 \times 10^{-4}$ | $1.1 \times 10^{-10}$ | $4.5 \times 10^{-10}$ |
| GC <sub>16S</sub> -Tmin  | $4.6 \times 10^{-4}$ | $2.2 \times 10^{-16}$ | $8.8 \times 10^{-16}$ | $5.5 \times 10^{-4}$ | $8.5 \times 10^{-8}$  | $3.4 \times 10^{-7}$  |
| GC <sub>23S</sub> -Tmax  | $6.6 \times 10^{-4}$ | $2.2 \times 10^{-16}$ | $5.9 \times 10^{-16}$ | 0.001                | $2.2 \times 10^{-16}$ | $1.8 \times 10^{-15}$ |
| GC <sub>23S</sub> -Topt  | $6.5 \times 10^{-4}$ | $2.2 \times 10^{-16}$ | $8.8 \times 10^{-16}$ | 0.001                | $1.2 \times 10^{-14}$ | $9.5 \times 10^{-14}$ |
| GC <sub>23S</sub> -Tmin  | $4.9 \times 10^{-4}$ | $2.2 \times 10^{-16}$ | $8.8 \times 10^{-16}$ | $8.3 \times 10^{-4}$ | $8.0 \times 10^{-11}$ | $6.4 \times 10^{-10}$ |

GC contents were the dependent variables, and growth temperatures were the independent variables.

The results in this table were obtained using the Brownian motion model. Similar results obtained from three other models are deposited in supplementary Table S5-S7.  $P_{BH}$ , Benjamini-Hochberg adjusted  $P$  value. Please see Table 1 for the meanings of the other abbreviations.

Table 3. The appearance of correlations in 1000 rounds of random resampling 155 samples from the 681 bacteria.

|                          | Significant negative<br>( $P < 0.05$ ) | Not significant<br>( $P > 0.05$ ) | Significant positive<br>( $P < 0.05$ ) |
|--------------------------|----------------------------------------|-----------------------------------|----------------------------------------|
| GC <sub>w</sub> -Tmax    | 0                                      | 974                               | 26                                     |
| GC <sub>w</sub> -Topt    | 0                                      | 991                               | 9                                      |
| GC <sub>p</sub> -Tmax    | 0                                      | 976                               | 24                                     |
| GC <sub>p</sub> -Topt    | 0                                      | 993                               | 7                                      |
| GC <sub>4</sub> -Tmax    | 0                                      | 962                               | 38                                     |
| GC <sub>4</sub> -Topt    | 0                                      | 992                               | 8                                      |
| GC <sub>non</sub> -Tmax  | 0                                      | 974                               | 26                                     |
| GC <sub>non</sub> -Topt  | 0                                      | 992                               | 8                                      |
| GC <sub>tRNA</sub> -Tmax | 0                                      | 12                                | 988                                    |
| GC <sub>tRNA</sub> -Topt | 0                                      | 21                                | 979                                    |
| GC <sub>5S</sub> -Tmax   | 0                                      | 308                               | 692                                    |
| GC <sub>5S</sub> -Topt   | 0                                      | 473                               | 527                                    |
| GC <sub>16S</sub> -Tmax  | 0                                      | 0                                 | 1000                                   |
| GC <sub>16S</sub> -Topt  | 0                                      | 0                                 | 1000                                   |
| GC <sub>23S</sub> -Tmax  | 0                                      | 0                                 | 1000                                   |
| GC <sub>23S</sub> -Topt  | 0                                      | 0                                 | 1000                                   |

GC contents were the dependent variables, and growth temperatures were the independent variables. The results in this table were obtained using the Brownian motion model. Please see Table 1 for the meanings of the other abbreviations. The datasets for each round of resampling are deposited in Supplementary Data S1.

Table 4. PGLS analysis of GC contents and growth temperatures in chromosomes and plasmids.

|                         | Plasmid              |          |                        | Chromosome           |          |                        |
|-------------------------|----------------------|----------|------------------------|----------------------|----------|------------------------|
|                         | Slope                | <i>P</i> | <i>P</i> <sub>BH</sub> | Slope                | <i>P</i> | <i>P</i> <sub>BH</sub> |
| GC <sub>w</sub> -Tmax   | 0.001                | 0.009    | 0.043                  | 9.6×10 <sup>-4</sup> | 0.029    | 0.043                  |
| GC <sub>w</sub> -Topt   | 0.001                | 0.005    | 0.031                  | 9.6×10 <sup>-4</sup> | 0.023    | 0.031                  |
| GC <sub>p</sub> -Tmax   | 0.001                | 0.016    | 0.043                  | 9.1×10 <sup>-4</sup> | 0.038    | 0.046                  |
| GC <sub>p</sub> -Topt   | 0.001                | 0.010    | 0.031                  | 9.2×10 <sup>-4</sup> | 0.031    | 0.034                  |
| GC <sub>4</sub> -Tmax   | 0.002                | 0.072    | 0.072                  | 0.002                | 0.027    | 0.043                  |
| GC <sub>4</sub> -Topt   | 0.002                | 0.044    | 0.044                  | 0.002                | 0.017    | 0.031                  |
| GC <sub>non</sub> -Tmax | 8.3×10 <sup>-4</sup> | 0.055    | 0.060                  | 0.001                | 0.021    | 0.043                  |
| GC <sub>non</sub> -Topt | 9.3×10 <sup>-4</sup> | 0.025    | 0.031                  | 0.001                | 0.021    | 0.031                  |

GC contents were the dependent variables, and growth temperatures were the independent variables.

The results in this table were obtained using the Brownian motion model. Similar results obtained from three other models are deposited in supplementary Table S9-S11. *P*<sub>BH</sub>, Benjamini-Hochberg adjusted *P* value. Please see Table 1 for the meanings of the other abbreviations.

Table 5. PGLS analysis of GC contents and growth temperatures in both core genes and accessory genes

|                       | Core genes           |                      |                        | Accessory genes      |          |                        |
|-----------------------|----------------------|----------------------|------------------------|----------------------|----------|------------------------|
|                       | Slope                | <i>P</i>             | <i>P</i> <sub>BH</sub> | Slope                | <i>P</i> | <i>P</i> <sub>BH</sub> |
| GC <sub>p</sub> -Tmax | 7.6×10 <sup>-4</sup> | 9.6×10 <sup>-4</sup> | 0.002                  | 9.0×10 <sup>-4</sup> | 0.001    | 0.002                  |
| GC <sub>p</sub> -Topt | 6.4×10 <sup>-4</sup> | 0.007                | 0.025                  | 6.3×10 <sup>-4</sup> | 0.026    | 0.030                  |
| GC <sub>4</sub> -Tmax | 0.002                | 6.3×10 <sup>-4</sup> | 0.002                  | 0.002                | 0.003    | 0.003                  |
| GC <sub>4</sub> -Topt | 0.002                | 0.004                | 0.025                  | 0.002                | 0.019    | 0.030                  |

GC contents were the dependent variables, and growth temperatures were the independent variables.

The results in this table were obtained using the Brownian motion model. Similar results obtained from three other models are deposited in supplementary Table S12-S14. *P*<sub>BH</sub>, Benjamini-Hochberg adjusted *P* value. Please see Table 1 for the meanings of the other abbreviations.
